# Supplementary material for: Leukemia inhibitory factor protects cholangiocarcinoma cells from drug-induced apoptosis via a PI3K/AKT-dependent Mcl-1 activation
Source: PubMed Central journal article supplement (PMC4694885; doi:10.18632/oncotarget.4482), 2015-07-20
Supplement: oncotarget-06-26052-s001.pdf [file oncotarget-06-26052-s001.pdf]

## SUPPLEMENTARY MATERIAL AND METHODS

### Immunohistochemistry and immunofluorescence

For immunohistochemical staining, after deparaffinization, sections were rehydrated in alcohol and endogenous peroxidase activity was quenched with methanol containing 3% H<sub>2</sub>O<sub>2</sub> for 30 mins. Antigen retrieval was performed by steam-heating the slides for 20mins in either 10 mmol/L citrate buffer (pH 6) for LIF or 1.27 mM ethylenediaminetetraacetic acid buffer (pH 8) for LIFR and gp130. Blocking was achieved using UltraVision protein block (ThermoScientific) for 8 mins. The sections were incubated with primary antibodies against LIF (1:50, Santa Cruz), LIFR (1:80, Santa Cruz) and gp130 (1:25, Santa Cruz) overnight at 4°C. After rinsing with phosphate-buffered saline 1M (PBS) supplemented with 0.05% Tween20 (PBS-T; both Sigma), slides were incubated for 30 mins at room temperature with EnVision horseradish peroxidase (HRP)-conjugated secondary antibody (DAKO). All antibodies were diluted in PBS. Specimens were developed using 3,3-diaminobenzidine tetrahydrochloride 0.04 mg/mL (Sigma) with H<sub>2</sub>O<sub>2</sub> 0.01% diluted in PBS and counterstained with Gill's Hematoxylin N°2 (Sigma). Specimens were analyzed with an Eclipse E800 microscope (Nikon) and LuciaG 5.0 software (Nikon), and images were collected with a digital camera (Nikon, DS-U1).

For immunofluorescence, sections were deparaffinized and rehydrated as described above. Antigen retrieval was performed as above using 10 mmol/L citrate buffer (pH 6). Blocking was achieved as above. The sections were incubated with primary antibodies against LIF (1:50, Santa Cruz), and CD45 (1:300, DAKO) or  $\alpha$ -SMA (1:100, DAKO) overnight at 4°C. Slides were then incubated for 30 mins at room temperature with the respective secondary Alexa Fluor 488- or 594-conjugated antibody (1:500, Life Technologies) and mounted with Vectastain + DAPI (Vector Laboratories).

### Immunocytochemistry

After fixation with 4% paraformaldehyde (Carlo Erba), cells were incubated overnight at 4°C with primary antibodies against LIF (1:100), and LIFR (1:100). After washing with PBS-T, the cells were incubated for 30 mins at room temperature with the appropriate Alexa Fluor 488 secondary antibody (1:500, Life Technologies) and then mounted with Vectastain + DAPI.

### ELISA for LIF quantification

Cells were seeded into a 24-well plate at  $5 \times 10^4$  per well. After 24 h, supernatants were harvested, stored at -80°C and then the ELISA was

developed according to the supplier (RayBiotech). A calibration curve was generated for each experiment.

### Western blotting (WB)

Equal concentrations of total lysate obtained from cultured cells were electrophoresed on a 4–12% NuPAGE® Novex Bis-Tris gel (Life Technologies) and proteins were transferred to a nitrocellulose membrane (Life Technologies). The membrane was then blocked with 5% non-fat dry milk (Euroclone) in Tris-buffered saline (TBS) supplemented with 0.1% Tween-20 (TBS-T) for 1 hour and then incubated overnight at 4°C with rabbit anti-LIFR (1:1000, Santa Cruz), rabbit anti-Bax (1:500, Santa Cruz), rabbit anti-phosphorylated Bax (pBax) (1:1000; Bioss), rabbit anti-B-cell lymphoma (Bcl)-2 (1:500, Santa Cruz), rabbit anti-myeloid cell leukemia (Mcl)-1 (1:1000, Cell Signaling), rabbit anti-STAT3, rabbit anti-phosphorylated STAT3 (pSTAT3) (both 1:1000, Cell Signaling), rabbit anti-AKT (1:1000, Cell Signaling), rabbit anti-phosphorylated AKT 1/2/3 (pAKT) (1:1000, Santa Cruz), rabbit anti-ERK1/2 (1:1000, Cell Signaling), and rabbit anti-phosphorylated ERK1/2 (pERK1/2) (1:1000, Cell Signaling). As a reference protein, mouse anti-GAPDH (1:10000, Santa Cruz) was used. The membrane was washed 3 times with TBS-T before incubation with goat anti-mouse (1:2000, Sigma) or goat anti-rabbit (1:2000, Bio-Rad) HRP-conjugated secondary antibodies for 1 hour. Proteins were visualized using enhanced chemiluminescence (SuperSignal West Pico, Thermo Scientific).

### Stem cell-like phenotyping

Briefly, untreated and rhLIF-treated (100 ng/mL for 24 hours) HuCCT-1 and TFK-1 cells were homogenized in 1 mL TRIzol® Reagent (Life Technologies). Template complementary DNA was obtained by reverse transcription using 0.5  $\mu$ g of total RNA, Superscript II reverse transcriptase (Life Technologies), random hexamers (50 pmol), and oligo-dT primers (100 pmol) (Promega). Relative transcript levels were quantified using Taqman gene expression probes for human Nanog and Oct4 (Life Technologies) and the real-time PCR was performed on an ABI 7500 thermocycler (Applied Biosystems). The relative expression of each gene was normalized against that of GAPDH.

### Gene expression of LIF and LIFR

Using the same approach described for stem-cell phenotyping, we quantified the relative expression levels of LIF and LIFR in established and primary CCA cell

lines using specific Taqman gene expression commercially available probes (Life Technologies).

### **Cell invasiveness**

Briefly,  $5 \times 10^4$  cells were re-suspended in serum-free medium and seeded over a polyvinylpyrrolidone-free polycarbonate, 8  $\mu$ m-pore membrane (Transwell, Costar) coated with 50  $\mu$ g/mL Matrigel, within a Boyden microchamber. The lower chambers contained serum-free medium with/without rhLIF (10, 100 ng/mL). After 48 hours, cells on the upper surface of the membrane were removed with a cotton swab whilst cells that adhered to the lower surface were fixed

and stained using a Diff-Quick Staining Set (Medion Diagnostics); ten random fields of each membrane were photographed to count the number of clearly discernible nuclei.

### **Silencing of LIFR**

Gene silencing of LIFR was performed using commercially available siRNAs against LIFR; scramble RNA served as a control (both Life Technologies). HuCCT-1 and TFK-1 cell lines were transfected using 20 pM of siRNA and Lipofectamine 2000 transfection reagent (Life Technologies) 24 h after plating. Transfection efficiency was assessed by WB and real-time PCR for LIFR.

## SUPPLEMENTARY FIGURES

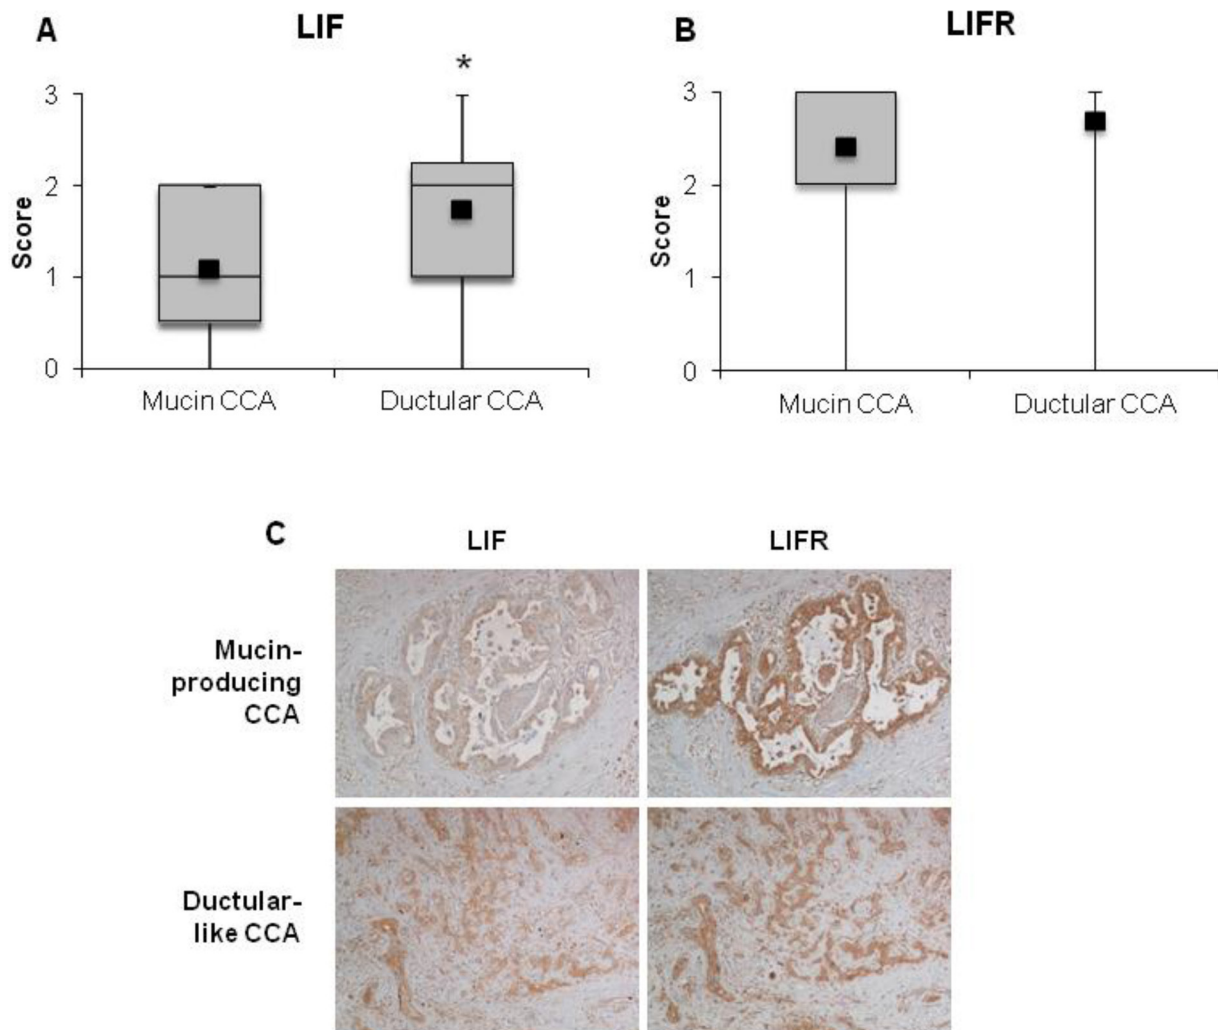

**Supplementary Figure 1: Extensiveness of LIF and LIFR expression in 'ductular-like' and 'mucin-producing' areas of CCA.** LIF expression was more extensive in 'ductular-like' than in 'mucin-producing' CCA bile ducts **A**., whereas no significant differences in LIFR staining were observed between the two CCA phenotypes **B**. Representative micrographs illustrating LIF and LIFR staining in sequential sections of 'mucin-producing' (upper panels) and 'ductular-like' (lower panels) CCA areas are shown **C**. (Original magnification: 200 x; \* $p < 0.05$ ).

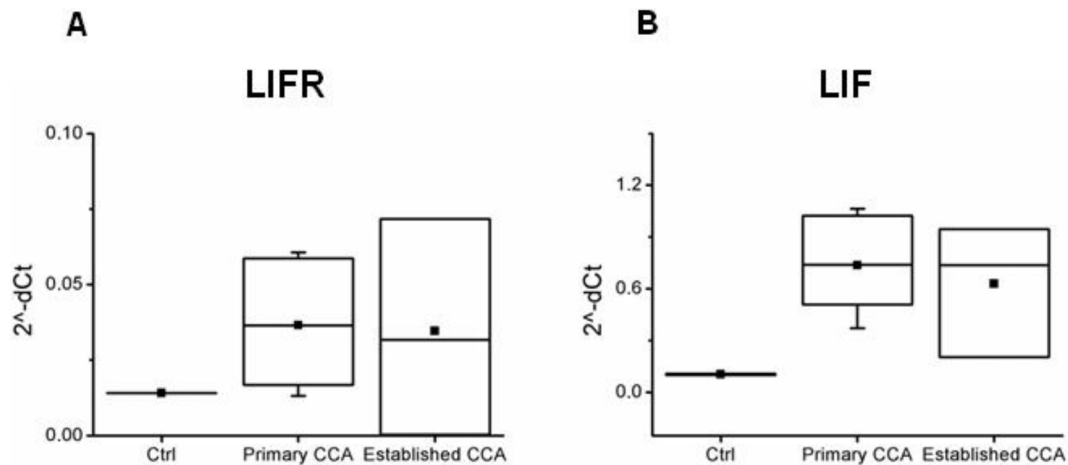

**Supplementary Figure 2: LIFR and LIF gene expression quantification in human primary control and CCA cholangiocytes, and established CCA cell lines.** To confirm data obtained by WB and ELISA, the gene expressions of LIFR **A.** and LIF **B.** were assessed in primary ( $n = 7$ ) and established ( $n = 3$ ) CCA cell lines, and in control ( $n = 2$ ) cholangiocytes by real-time PCR. The results show increased mRNA levels for both receptor and ligand in CCA cells compared with controls.

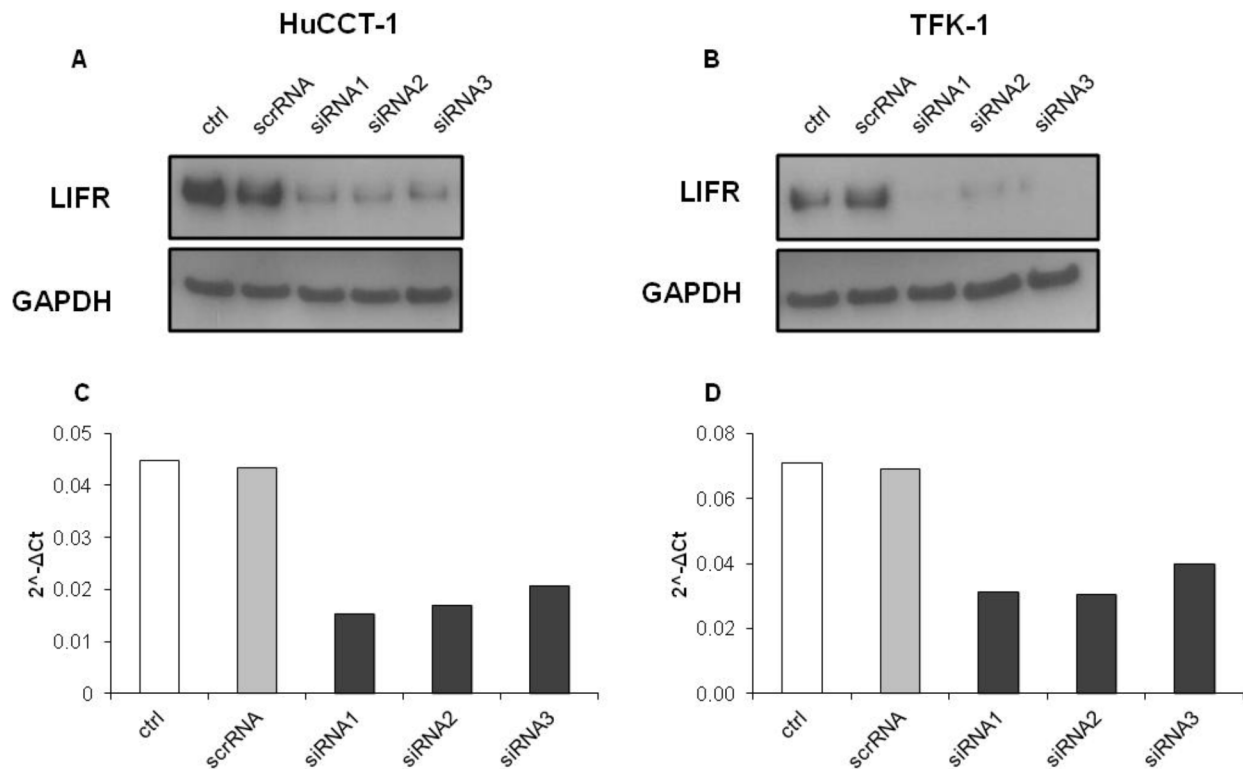

**Supplementary Figure 3: Effects of siRNA on LIFR expression in CCA cells.** The ability of three different siRNAs (siRNA1, siRNA2, and siRNA3) to suppress LIFR expression was evaluated by both WB and real-time PCR in HuCCT-1 **A.** **C.** and TFK-1 **B.** **D.** cells. All siRNAs induced a pronounced reduction in protein (**A.** **B.**) and transcript levels (**C.** **D.**) of LIFR. Therefore, siRNA1 and siRNA2 were selected for the experiments on cell proliferation (shown in Supplementary Figure 4C, 4D) and drug-induced cytotoxicity (shown in Figure 3C, 3D).

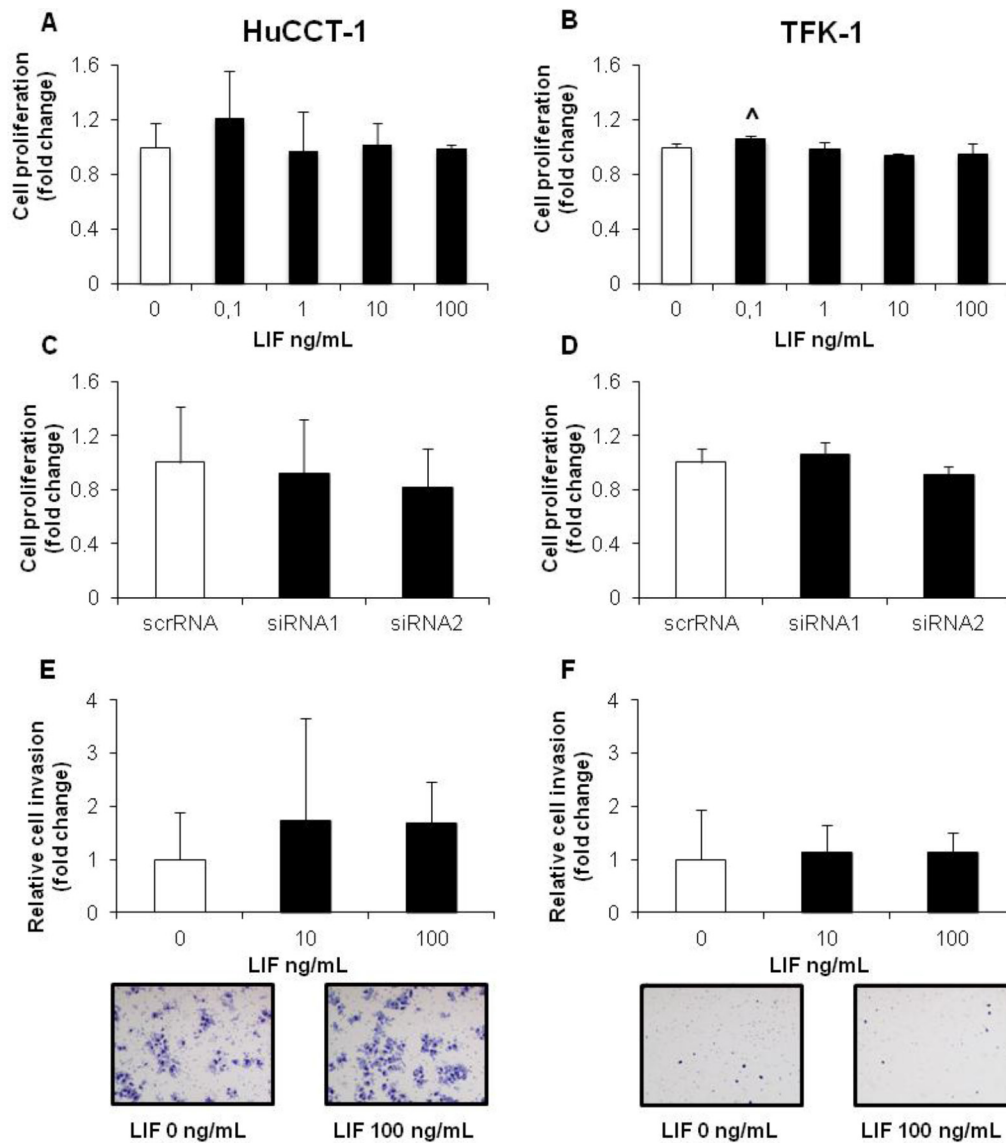

**Supplementary Figure 4: LIF did not affect cell proliferation and invasion of HuCCT-1 and TFK-1 cells.** By MTS assay, HuCCT-1 **A.** and TFK-1 **B.** cells challenged with rhLIF at increasing doses, did not show any relevant changes in cell proliferation, except for a minimal increase with the lowest dose in TFK-1 ( $p < 0.01$  vs. LIF 0;  $n = 3$  in duplicate). Interestingly, in absence of rhLIF stimulation, LIFR silencing did not reduce cell proliferation of HuCCT-1 **C.** and TFK-1 **D.** cells compared with scramble, thus ruling out a possible constitutive activation of cell proliferation that could be exerted by autocrine LIF. Additionally, no effects were observed on cell invasion with either HuCCT-1 **E.** or TFK-1 **F.** cells upon LIF stimulation, as assessed in Boyden chamber assays ( $n =$  minimum of 3). Micrographs of representative fields of invaded cells in response to medium alone or LIF supplementation are illustrated (Original magnification: 100 $\times$ ).

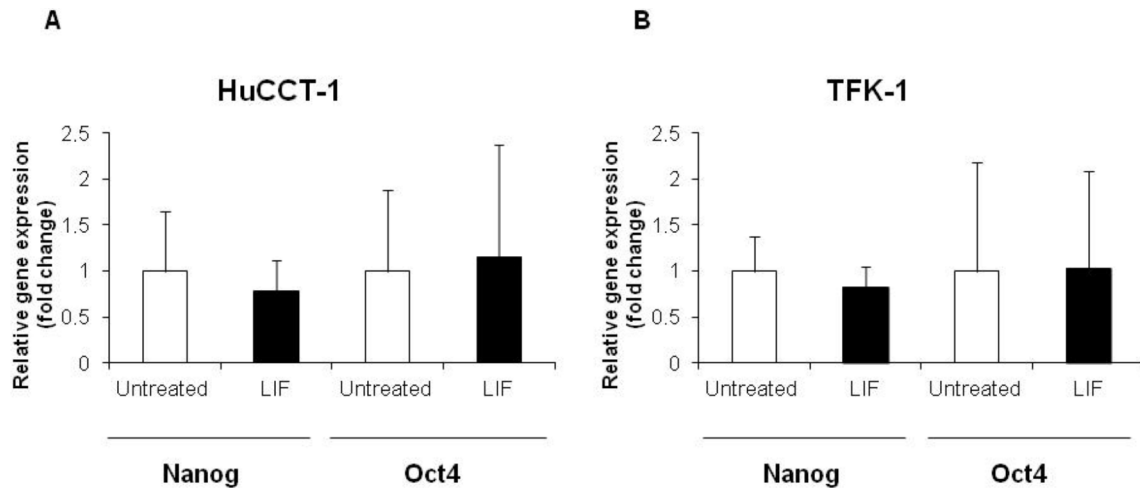

**Supplementary Figure 5: rhLIF did not increase gene expression of Nanog and Oct4 in HuCCT-1 and TFK-1 cells.** By real-time PCR, rhLIF stimulation (100 ng/mL) was unable to change Nanog and Oct4 mRNA levels in HuCCT-1 **A.** and TFK-1 **B.** cells ( $n = 3$ ).

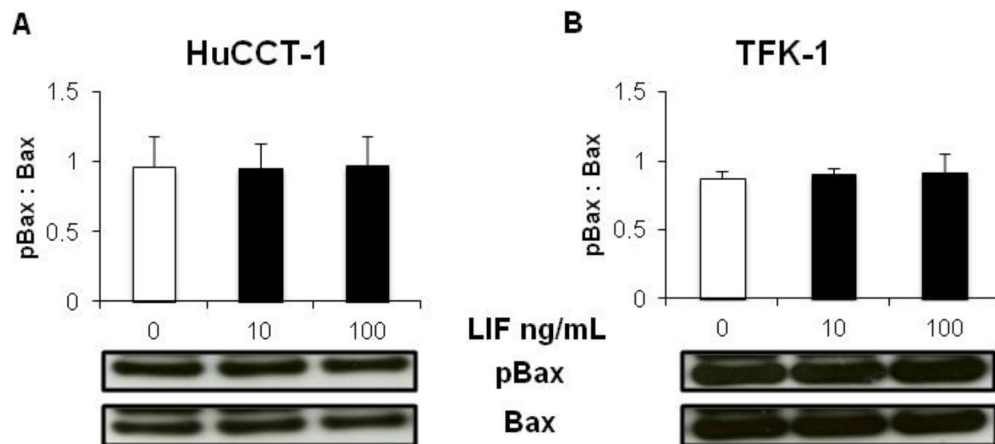

**Supplementary Figure 6: Effects of rhLIF on Bax phosphorylation in CCA cells.** By WB, rhLIF did not modify pBax:Bax (pro-apoptotic) in either HuCCT-1 **A.** or TFK-1 **B.** cells compared with untreated cells. Representative blots are shown below each respective graph  $n = 3$ ).
